# Supplementary material for: Zinc activation of OTOP proton channels identifies structural elements of the gating apparatus
Source: eLife. 2023 Apr 13;12:e85317. doi: 10.7554/eLife.85317 (PMC10101688; doi:10.7554/eLife.85317)
Supplement: Figure 1—source data 1. [file elife-85317-fig1-data1.xlsx]

## Sheet: Figure 1D
	Zn2+ concentration(mM)	Zn2+ potentiation				Zn2+ blocking
	0.1	1.22443	1.29449	1.2228	1.17042	0.171518	0.151297	0.205628	0.139328	0.145604	0.140893
	0.3	1.55729	1.61678	1.78278	1.6056	0.455128	0.368957	0.357338	0.357396	0.393975	0.373399
	1	2.36136	2.51163	2.58805	2.30207	0.425844	0.46735	0.529595	0.521878	0.546442	0.526001
	3	3.83366	3.67348	4.32203	3.79599	0.546075	0.493381	0.679426	0.668346	0.723077	0.708699
	10	5.48416	5.72815	6.57866	5.81926	0.504518	0.498826	0.685144	0.738692	0.830747	0.86677

## Sheet: Figure 1E
		Potentiation (fold)
	[Zn2+]	0	1
		8.1891	5.85597
		4.15846	4.18686
		4.05032	4.80453
		3.90258
		3.53654
