# Supplementary material for: Zinc activation of OTOP proton channels identifies structural elements of the gating apparatus
Source: eLife. 2023 Apr 13;12:e85317. doi: 10.7554/eLife.85317 (PMC10101688; doi:10.7554/eLife.85317)
Supplement: Figure 2—source data 1. [file elife-85317-fig2-data1.xlsx]

## Sheet: Figure 2C
		Potentiation (fold)
	Time (s)	0.3 mM Zn2+							1 mM Zn2+							3 mM Zn2+
	0.5	1	1	1	1	1	1	1	1	1	1	1	1	1	1	1	1	1	1	1
	1	1.05738	0.939773	0.877301	0.760771	0.951691	0.563335	0.948543	1.60701	1.32977	1.93719	0.887691	0.953148	0.919689	1.09362	3.09517	2.35514	3.11361	1.92149	1.28063
	2	0.844262	0.957955	0.711656	0.780045	0.864734	0.570974	0.920645	3.04847	2.01069	2.87273	1.08593	0.913616	1.51943	1.42638	4.59909	4.07165	4.1929	3.12227	2.30209
	4	0.762295	0.929545	0.709202	0.564626	0.811594	0.478039	0.847489	5.10962	3.24733	3.67934	1.88684	1.0571	2.72798	1.44511	5.02568	6.1729	5.1432	4.4157	3.3466
	8	0.995902	0.911364	0.69816	1.21769	1.21981	0.462126	0.796652	4.68456	3.86718	4.53719	3.24617	1.67204	4.18523	2.7183	5.23776	8.90654	5.93136	6.49035	4.55288
	16	0.987705	0.769318	0.742331		1.00725	0.486314	0.818351			6.3157	4.42967	2.55783	6.77979	4.51319	4.88127	11.8863	6.10651	9.17246	5.76283
	32		1.1625	0.943558		1.31643	0.531509	0.866708				4.29949	3.69546	7.27202	4.43489	4.62145	13.8474	7.11479	11.2857	6.60471
	64		1.11136	1.33865		1.42029	0.530236	0.932424				4.26432	4.81552		4.8834	6.51239	14.8692	8.87811	14.242	7.19634

## Sheet: Figure 2D
			Time to Ipeak (s)
		Time (s)	0.3 mM Zn2+							1 mM Zn2+							3 mM Zn2+
		0	3.813	5.192	6.423	7.448	4.443	5.45	5.06	4.847	6.738	3.86	2.76	5.04	6.4	3.26	4.18	5.15	4.15	4.06	4.4
		1	3.983	4.825	6.374	6.77	4.867	5.3	4.74	1.258	2.485	0.96	0.93	1.33	0.85	1.56	0.52	0.66	0.5	0.6	1.17
		2	2.496	4.302	6.469	7.99	3.656	6.42	4.16	1.084	2.255	0.94	0.81	0.71	0.84	1.1	0.49	0.68	0.48	0.59	0.79
		4	2.143	3.949	6.068	6.695	2.962	5.73	4.33	1.083	2.288	0.81	0.77	0.55	0.64	1.06	0.53	0.64	0.51	0.58	0.82
		8	1.935	3.173	5.407	4.711	1.949	6.38	4.46	1.252	2.618	0.83	0.75	0.58	0.63	1.04	0.54	0.6	0.51	0.58	0.81
		16	1.82	3.16	1.934	2.318	2.145	6.11	4.15			0.86	0.73	0.59	0.63	1.03	0.56	0.63	0.53	0.59	0.8
		32		1.793	1.508		1.906	6.83	3.55				0.74	0.63	0.65	1.02	0.59	0.6	0.51	0.57	0.78
		64		1.793	1.517		1.977	4.5	3.31				0.75	0.67		1.03	0.57	0.58	0.57	0.61	0.78
