# Supplementary material for: Zinc activation of OTOP proton channels identifies structural elements of the gating apparatus
Source: eLife. 2023 Apr 13;12:e85317. doi: 10.7554/eLife.85317 (PMC10101688; doi:10.7554/eLife.85317)
Supplement: Figure 3—source data 1. [file elife-85317-fig3-data1.xlsx]

## Sheet: Figure 3B
		Washoff time (s)	Potentiation (fold)
		0	3.74038	4.42967	4.7961	4.51319	2.53459	2.96537
		1	1.54513	2.07071	2.58168	2.02016	1.94161	1.45275
		2		2.27273	2.77351	2.16667	1.35099	1.61187
		4		2.36364	1.68339	1.76781	1.33113	1.31963
		8	2.53944	2.39376	1.08803	1.66208	1.48182	1.18396
		16		1.78947	0.840416	1.05144	1.29091	1.14858
		32	1.09514	0.693841	1.09863	1.15305	1.42105
		64	0.782241		0.973973	1.05273	0.973684

## Sheet: Figure 3C
		Washoff time (s)	Time to Ipeak (s)
		0	0.55	0.95	0.57	0.69	0.7	0.77
		1	1.69	1.46	1.51	1.13	1.1	2.2
		2		1.46	1.72	1.91	1.31	3.31
		4		1.99	2.52	3.5	1.19	4.35
		8	0.92	2.39	2.57	6.06		6.51
		16		3.13	2.58	6.88		7.26
		32	2.44	4.32	3.38	7.68
		64	2.91	4.94		7.45
