# Supplementary material for: Zinc activation of OTOP proton channels identifies structural elements of the gating apparatus
Source: eLife. 2023 Apr 13;12:e85317. doi: 10.7554/eLife.85317 (PMC10101688; doi:10.7554/eLife.85317)
Supplement: Figure 4—source data 1. [file elife-85317-fig4-data1.xlsx]

## Sheet: Figure 4B
	Potentiation (fold)
	mOTOP1	mOTOP2	mOTOP3
	0.760614	0.996333	3.74038
	0.836406	1.03881	4.42967
	1.24089	0.984556	4.7961
	1.18588	0.870445	4.51319
	1.19091	0.911932	2.53459
	0.94747		3.3629
	0.904208		4.45253
	0.952752		2.96537

## Sheet: Figure 4D
			Potentiation (Fold)
		Time (s)	mOtop1
		0	1	1	1	1	1
		1	1.5523	2.14097	1.49524	1.09856	1.39053
		4	1.62838	2.36518	1.56429	1.09856	1.57988
		16	2.08193	2.96121	1.5	1.1807	3.12426
		64	3.13021	4.01135	1.23809	1.2731	3.9645

## Sheet: Figure 4E
			Time to Ipeak (s)
		Time (s)	mOtop1
		0	0.83	0.72	0.76	0.79	0.99
		1	0.95	0.7	0.64	1.09	0.89
		4	0.78	0.85	0.68	1.22	0.94
		16	0.9	0.83	0.74	1.23	1.09
		64	0.89	0.94	0.88	1.33	1.25
