# Supplementary material for: Zinc activation of OTOP proton channels identifies structural elements of the gating apparatus
Source: eLife. 2023 Apr 13;12:e85317. doi: 10.7554/eLife.85317 (PMC10101688; doi:10.7554/eLife.85317)
Supplement: Figure 5—source data 1. [file elife-85317-fig5-data1.xlsx]

## Sheet: Figure 5B
		Potentiation (fold)
		Zn2+	Fe2+	Co2+	Ni2+	Cu2+	Cd2+
		2.55128	0.767908	1.21875	1.29364	13.533	1.27221
		5.43478	0.516616	1.22222	1.44743	13.1299	2.99327
		3.25403	0.5625	0.982808	1.42384	12.0808	0.715517
		2.38342	0.570312	0.996979	1.41156	6.28772	1.60938
		2.02521	0.829268	0.5625	1.39207	14.9219	1.97561
		4.12245	0.523952	1.33594	1.60504	24.3537	1.55689
		3.03051	0.746988	1.65854	1.83188	9.62275	1.73482
		5.53782	0.666667	0.937126	1.59195	10.9955
		3.51667		0.986928	2.34633	10.9961
		3.40419		0.866142	1.71154	2.26623
		5.98459				9.16667
		3.26518

## Sheet: Figure 5C
		Time to Ipeak (s)
		ctrl	Zn2+	Fe2+	Co2+	Ni2+	Cu2+	Cd2+
		8	1.67	8	8	5.25	1.36	8
		7.8	1.37	8	8	4.95	1.67	0.41
		8	0.66	8	8	2.52	1.11	0.99
		8	0.84	8	8	3.34	0.62	0.71
		8	0.79	8	8	2.52	0.78	0.32
		8	0.51	8	8	2.23	0.94	8
		8	0.64	8	8	1.61	0.79	0.57
		8	0.62	8	8	3.06	1.88
		8	0.58		8	2.57	1.35
		8	0.74		8	2.05	0.68
		8	0.56				1.92
		8	1.01
		8
		7.7
		6.49
