# Supplementary material for: Zinc activation of OTOP proton channels identifies structural elements of the gating apparatus
Source: eLife. 2023 Apr 13;12:e85317. doi: 10.7554/eLife.85317 (PMC10101688; doi:10.7554/eLife.85317)
Supplement: Figure 6—source data 1. [file elife-85317-fig6-data1.xlsx]

## Sheet: Figure 6C
			Potentiation (fold)
			O2_O3				O3_O2
		WT	1.02427	0.97343	1.02459	0.878906	5.825	4.71053	4.86325	5.6	7.77979	4.51319
		L1-2	0.980769	0.986842	0.931298		7.88333	13.6774	23	49.625	39.3333
		L3-4	0.943396	1	0.890909	1.07143	4.48967	3.28174	2.70936	4.1082
		L5-6	0.768	1.02143	0.887097	1.06667	5.13129	1.59538	13.3939	4.1082
		L7-8	0.982609	0.771429	1.08065	1.00529	15.9104	13.2329	15.1691	36.8499
		L9-10	0.833333	1.13044	1.07143	1.47059	16.1679	13.9214	11.9453	12.8244
		L11-12	3.35587	6.42296	4.1519	3.13686	0.727684	1.10909	0.6	0.951496

## Sheet: Figure 6D
			Currents (-pA) with and without Zn2+
			ctrl				Zn2+
		WT	61.8	41.4	24.4	25.6	63.3	40.3	25	22.5
		L1-2	10.4	7.6	13.1		10.2	7.5	12.2
		L3-4	5.3	1.7	5.5	1.4	5	1.7	4.9	1.5
		L5-6	25	14	37.2	7.5	19.2	14.3	33	8
		L7-8	23	17.5	12.4	18.9	22.6	13.5	13.4	19
		L9-10	2.4	2.3	1.4	3.4	2	2.6	1.5	5
		L11-12	28.1	33.1	39.5	45.3	94.3	212.6	164	142.1

## Sheet: Figure 6E
			Currents (-pA) with and without Zn2+
			ctrl						Zn2+
		WT	16	21.4	24.7	12.5	77.2	117.5	93.2	113.7	120.9	70	300.6	530.3
		L1-2	6	3.1	1.5	4	2.7		47.3	42.4	34.5	198.5	106.2
		L3-4	314.5	341.8	406				1412	1121.7	1100
		L5-6	71.6	181.9	62.7	290.2			367.4	290.2	839.8	1192.2
		L7-8	214.2	253.3	168	75.3			3408	3351.9	2548.4	2774.8
		L9-10	81.6	76.3	91.4	45			1319.3	1062.2	1091.8	577.1
		L11-12	88.5	44	305	96.9			64.4	48.8	183	92.2

## Sheet: Figure 6G
			Potentiation (fold)
		Time (s)	mO3_mO2_L11-12				WT_Otop3
		0	1	1	1	1	1	1	1	1	1
		1	2.121	1.01734	1.04478	0.928717	1.93719	0.887691	0.953148	0.919689	1.09362
		4	2.879	1.17919	1.43035	1.04888	3.67934	1.88684	1.0571	2.72798	1.44511
		16	4.83986	1.87283	3.19154	1.49287	6.3157	4.42967	2.55783	6.77979	4.51319
		64	8.92527	3.98844	8.25871	2.72098		4.26432	4.81552		4.8834

## Sheet: Figure 6H (right panel)
				Currents (pA) with and without Zn2+
				mOTOP2		mO2_mO3_L11-12
				ctrl	Zn2+	ctrl	Zn2+
				64.4	48.8	48.5	23.5
				58.6	43.6	25.3	15.6
				51.3	30.5	56.8	11.5
				48.9	17.3	24.5	7.2
				41.1	27.6
				29.3	6.7
				120.2	36.5
				84.4	41.4
