# Supplementary material for: Zinc activation of OTOP proton channels identifies structural elements of the gating apparatus
Source: eLife. 2023 Apr 13;12:e85317. doi: 10.7554/eLife.85317 (PMC10101688; doi:10.7554/eLife.85317)
Supplement: Figure 7—source data 1. [file elife-85317-fig7-data1.xlsx]

## Sheet: Figure 7C
		Inhibition (fractional)
		WT	O3/O2(L1-2)	O3/O2(L3-4)	O3/O2(L5-6)	O3/O2(L7-8)	O3/O2(L9-10)	O3/O2(L11-12)
		0.490909	N/A	0.57355	0.770791	0.655908	0.542934	0.287102
		0.484375		0.587282	0.715723	0.66428	0.52821	0.305358
		0.536134		0.621355	0.813278	0.652328	0.535664	0.405743
		0.55313			0.739474	0.660096	0.547264	0.518843
							0.480607	0.391341
								0.492958
