# Supplementary material for: Zinc activation of OTOP proton channels identifies structural elements of the gating apparatus
Source: eLife. 2023 Apr 13;12:e85317. doi: 10.7554/eLife.85317 (PMC10101688; doi:10.7554/eLife.85317)
Supplement: Figure 8—figure supplement 1—source data 1. [file elife-85317-fig8-figsupp1-data1.xlsx]

## Sheet: Fig 8 Sup 1C left panel
		Potentiation (fold)
		mOTOP2	R517H
		0.93	0.19
		1.05	0.92
		0.95	0.17
		0.77	0.62
		0.34	0.35
		1.19	0.73
			0.94
			0.41
			0.75
			0.31
			1.03
			0.67
			0.51

## Sheet: Fig 8 Sup 1C right panel
			Currents (-pA) with and without Zn2+
			mOTOP2		R517H
			ctrl	Zn2+	ctrl	Zn2+
			141.3	131.68	72.48	13.58
			75.99	79.35	13.58	12.51
			77.9724	74.16	63.78	10.83
			63.9343	49.13	40.74	25.18
			140.381	47.3	106.05	36.62
			267.944	317.54	18.31	13.43
					12.66	11.9
					38.76	15.72
					53.71	40.44
					386.05	118.26
					13.12	13.58
					40.59	27.31
					49.74	25.48

## Sheet: Fig 8 Sup 1D left panel
		Potentiation (fold)
		mOTOP1	R544H
		1.71	1.67
		1.31	1.71
		1.25	1.66
		1.38	2.06
		0.93	1.59
		1.47	1.42
		1.67	1.79
		1.32	1.8
		1.17

## Sheet: Fig 8 Sup 1D right panel
				Currents (-pA) with and without Zn2+
				mOTOP1		R554H
				ctrl	Zn2+	ctrl	Zn2+
				391.85	670.62	245.21	409.85
				200.65	262.91	287.02	492.1
				120.54	151.21	331.12	550.38
				234.83	324.4	274.66	565.95
				87.28	81.48	250.55	399.17
				639.19	942.23	126.65	179.75
				213.62	356.29	293.58	524.75
				229.95	302.43	360.41	649.11
				292.82	341.95
