# Supplementary material for: Zinc activation of OTOP proton channels identifies structural elements of the gating apparatus
Source: eLife. 2023 Apr 13;12:e85317. doi: 10.7554/eLife.85317 (PMC10101688; doi:10.7554/eLife.85317)
Supplement: Figure 8—source data 1. [file elife-85317-fig8-data1.xlsx]

## Sheet: Figure 8C
		Potentiation (fold)
	Time (s)	WT_Otop3									H531A				H531R
	0	1	1	1	1	1	1	1	1	1	1	1	1	1	1	1	1	1	1	1	1
	1	1.60701	1.32977	1.3848	1.93719	1.66667	0.887691	0.953148	0.919689	1.09362	1.12199	0.804924	0.630412	0.868058	0.981775	1.14533	0.567004	1.09668	1.03819	1.17867	0.628044
	2	3.04847	2.01069	2.59181	2.87273	2.30357	1.08593	0.913616	1.51943	1.42638	1.06916	0.592186	0.743319	0.53781	1.09826	0.930323		1.16753	1.2565	1.26983	0.612146
	4	5.10962	3.24733		3.67934		1.88684	1.0571	2.72798	1.44511	0.976375	0.607439	0.690698		1.30771	0.921053		1.17417	1.20113	1.43118	0.689487
	8	4.68456	3.86718		4.53719		3.24617	1.67204	4.18523	2.7183	0.950601	0.572117	0.65693		0.945325	0.844498		1.15867	1.29085	1.45351	0.81037
	16				6.3157		4.42967	2.55783	6.77979	4.51319	0.91323	0.646775	0.632898		1.5935	0.747309		1.07159	1.29853	1.67867	0.908909
	32						4.29949	3.69546	7.27202	4.43489	0.994416	0.618143	0.641807		1.63471	0.756579		1.14613	1.3765		1.05915
	64						4.26432	4.81552		4.8834	0.977234	0.598341	0.643257		1.64237	0.872608		1.1321			1.11243

## Sheet: Figure 8D
		Time to Ipeak (s)
	Time (s)	WT_Otop3									H531A				H531R
	0	4.847	6.738	3.79	3.86	4.15	2.76	5.04	6.4	3.26	2.674	1.734	1.66	2.448	2.11	4.97	5.48	3.5	6.1	3.53
	1	1.258	2.485	0.67	0.96	1.9	0.93	1.33	0.85	1.56	2.081	1.674	1.586	2.508	1.95	4.09	5.56	3.2	5.49	3.67
	2	1.084	2.255	0.66	0.94	1	0.81	0.71	0.84	1.1	2.066	1.895	1.419	2.773	1.62	4.33		2.68	4.99	3.84
	4	1.083	2.288		0.81		0.77	0.55	0.64	1.06	2.214	1.879	1.521		1.55	4.24		2.75	4.57	3.58
	8	1.252	2.618		0.83		0.75	0.58	0.63	1.04	2.168	1.92	1.654		1.69	4.42		2.63	4.7	3.59
	16				0.86		0.73	0.59	0.63	1.03	2.223	1.789	1.699		1.37	4.59		2.56	4.21	3.68
	32						0.74	0.63	0.65	1.02	1.986	1.681	1.649		1.45	4.61		2.53		3.68
	64						0.75	0.67		1.03	1.995	1.836	1.594		1.56	4.48				3.85

## Sheet: Figure 8G
	Potentiation (fold)
	WT	E533A	E533H	E535A	E535S
	3.74038	2.73105	3.26691	1.09167	3.12552
	2.53459	2.84168	3.90441	0.8325	4.37753
	2.96537	2.10048	3.95849	1.8354	1.20973
	4.7961	1.52998	5.17671	0.942574	4.93918
	3.3629	3.56618		1.54462	2.17105
	4.45253			1.36715	5.27022

## Sheet: Figure 8H
		Time to Ipeak (s) with and without Zn2+
		ctrl						Zn2+
	WT	8.03	7.78	8.1	6.86	5.47	8.16	0.85	0.69	0.77	0.57	0.7	0.56
	E533A	4.86	5.08	4.82	4.26	6.57		0.8	0.86	0.91	0.81	0.91
	E533H	4.54	4	4.62	4.76			0.43	0.47	0.43	0.5
	E535A	9.03	10.9	10.42	11.9	9.77	13.8	5.39	0.59	0.68	4.13	2.77	0.83
	E535S	6.11	3.89	8.24	6.69	12.9	8.18	0.59	0.46	3.38	0.5	0.84	0.52
