# Supplementary material for: Zinc activation of OTOP proton channels identifies structural elements of the gating apparatus
Source: eLife. 2023 Apr 13;12:e85317. doi: 10.7554/eLife.85317 (PMC10101688; doi:10.7554/eLife.85317)
Supplement: Figure 9—source data 1. [file elife-85317-fig9-data1.xlsx]

## Sheet: Figure 9F
	Potentiation (fold)
	WT	H234A	E238A	H234A / E238A
	11.95	3.96	2.26	1.01
	7.53	2.29	2.65	1.11
	9.66	2.18	2.42	1.24
	11.7	3.5	2.1	1.61
	8.49	5.66	2.56	1.38
			3.38	1.22

## Sheet: Figure 9G
		Currents (-pA) with and without Zn2+
		ctrl						Zn2+
	WT	8.69751	23.0408	4.88281	10.2234	50.2		103.912	173.492	47.1497	119.629	426.18
	H234A	150.909	120.239	34.0271	24.5666	140.839		583.038	267.944	71.7163	83.6182	779.266
	E238A	23.1934	60.2722	25.7873	48.6755	21.97	13.89	52.6428	162.964	66.8335	102.692	56.3	47
	H234A / E238A	37.6892	140.686	95.52	101.013	50.2014	19.6838	38.147	155.792	118.103	162.964	69.4275	24.1089

## Sheet: Figure 9H
			time to Ipeak (s)
			ctrl						16s Zn2+
		WT	7.446	7.9884	7.9894	7.4532	7.782		0.4698	0.4852	0.387	0.4428	0.4858
		H234A	5.13	5.89	7.906	8	6.799		0.3	0.3602	0.478	0.2984	0.393
		E238A	8	7.99	8	8	7.97	8	0.52	0.79	0.737	0.8068	0.69	0.649
		H234A / E238A	8	7.774	7.6084	7.6616	7.987	7.9316	0.459	0.3912	0.3258	0.382	0.4626	0.6848
